# Supplementary material for: Prognostic effect of intratumoral neutrophils across histological subtypes of non-small cell lung cancer
Source: PubMed Central journal article supplement (PMC5342153; doi:10.18632/oncotarget.12360), 2016-09-30
Supplement: oncotarget-07-72184-s001.pdf [file oncotarget-07-72184-s001.pdf]

# Prognostic effect of intratumoral neutrophils across histological subtypes of non-small cell lung cancer

## SUPPLEMENTARY FIGURES AND TABLE

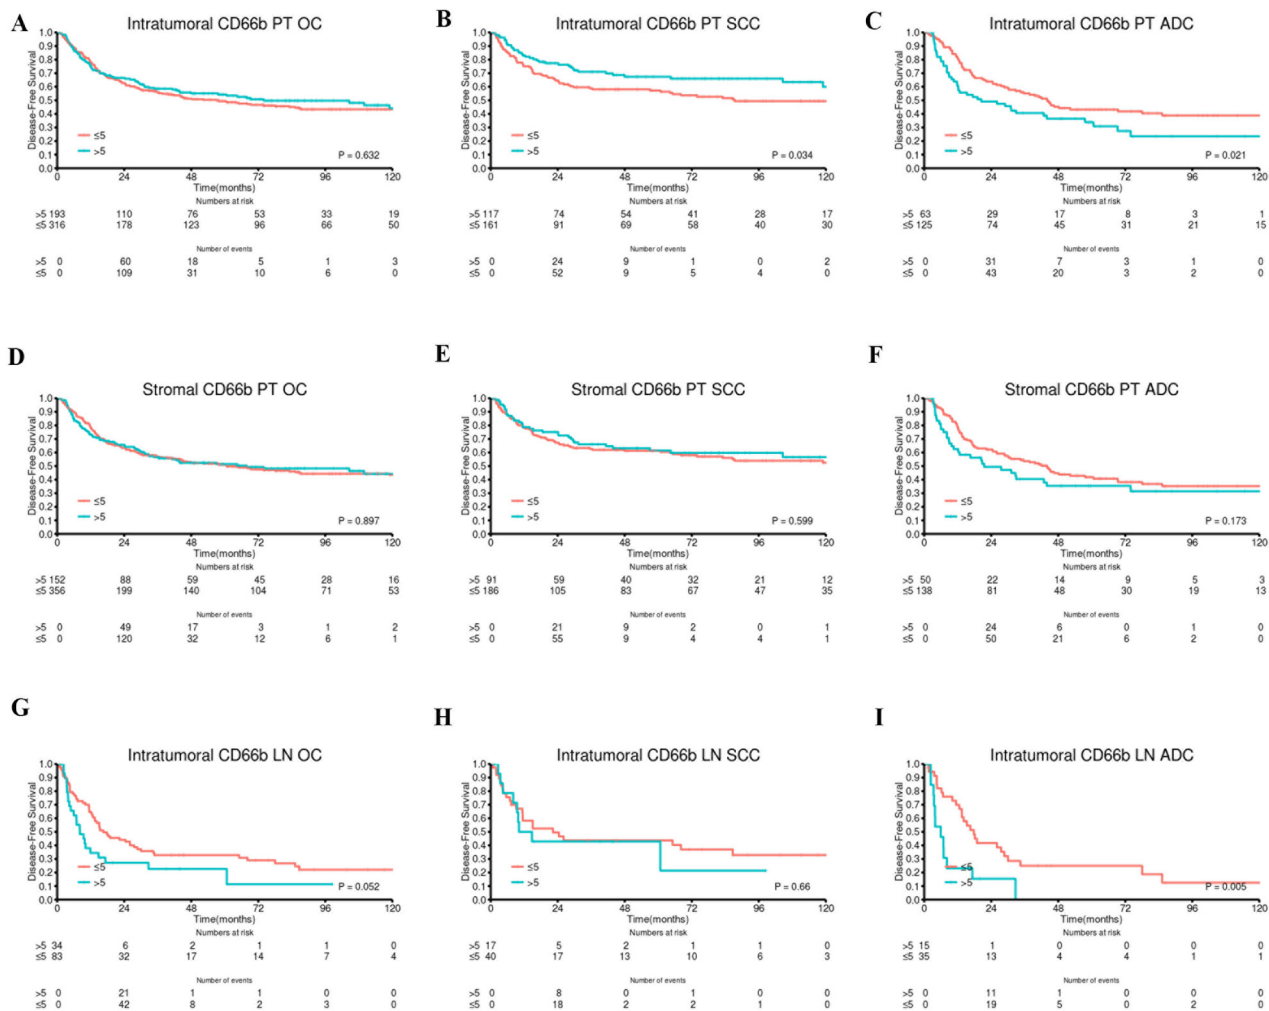

**Supplementary Figure S1: Disease-free survival curves for A.** Intratumoral CD66b in the overall cohort (OC) of primary tumors (PT); **B.** Intratumoral CD66b in squamous cell carcinomas (SCC) of PT; **C.** Intratumoral CD66b in adenocarcinomas (ADC) of PT; **D.** Stromal CD66b in the overall cohort of PT; **E.** Stromal CD66b in SCC of PT; **F.** Stromal CD66b in ADC of PT; **G.** Intratumoral CD66b in the overall cohort of LN+; **H.** Intratumoral CD66b in SCC of LN+; **I.** Intratumoral CD66b in ADC of LN+

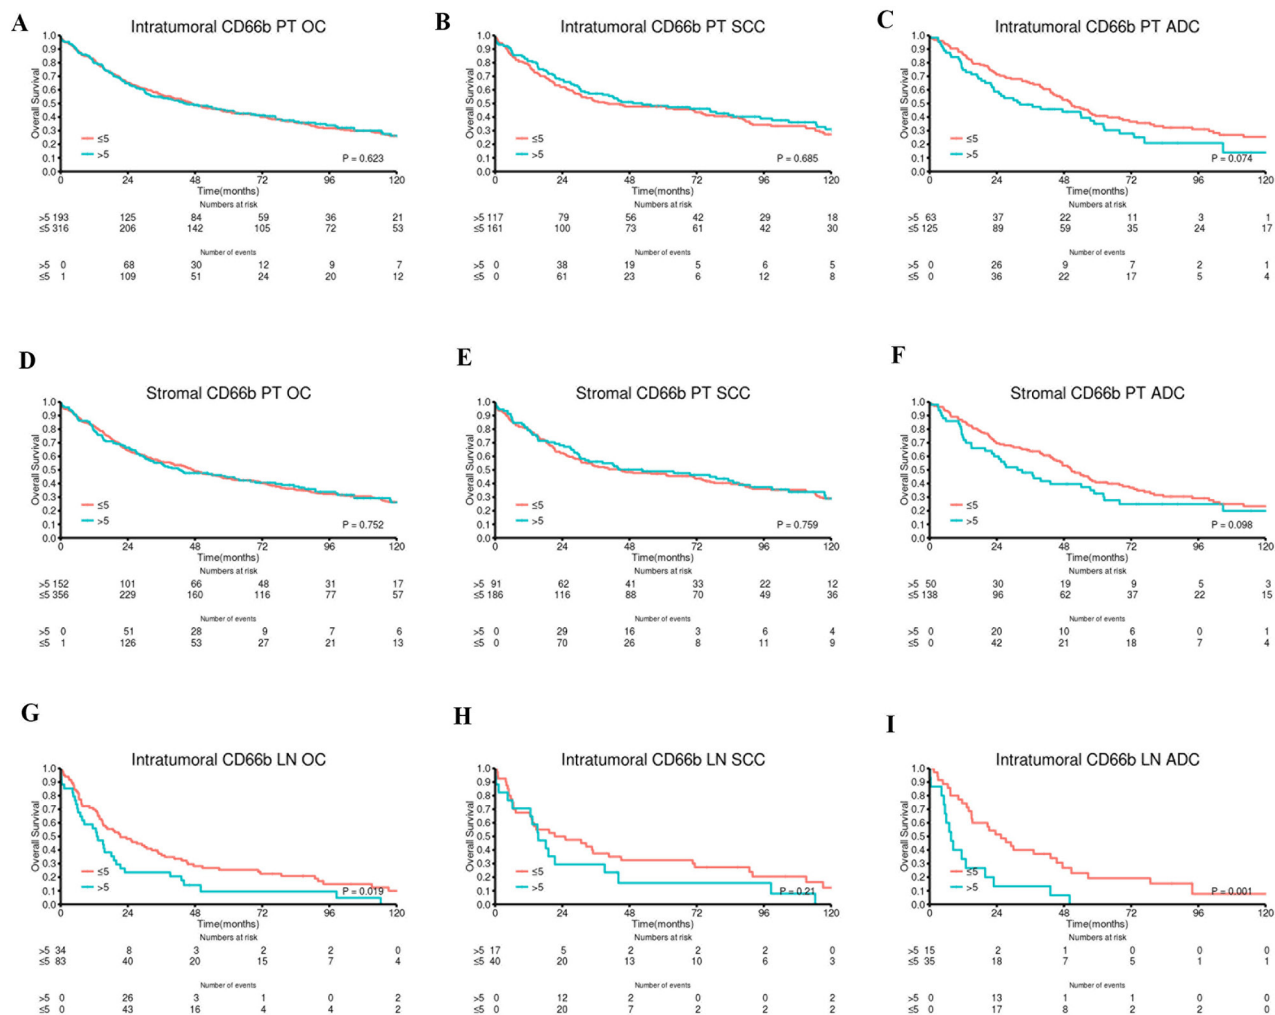

**Supplementary Figure S2: Overall survival curves for A.** Intratumoral CD66b in the overall cohort (OC) of primary tumors (PT); **B.** Intratumoral CD66b in squamous cell carcinomas (SCC) of PT; **C.** Intratumoral CD66b in adenocarcinomas (ADC) of PT; **D.** Stromal CD66b in the overall cohort of PT; **E.** Stromal CD66b in SCC of PT; **F.** Stromal CD66b in ADC of PT; **G.** Intratumoral CD66b in the overall cohort of LN+; **H.** Intratumoral CD66b in SCC of LN+; **I.** Intratumoral CD66b in ADC of LN+.

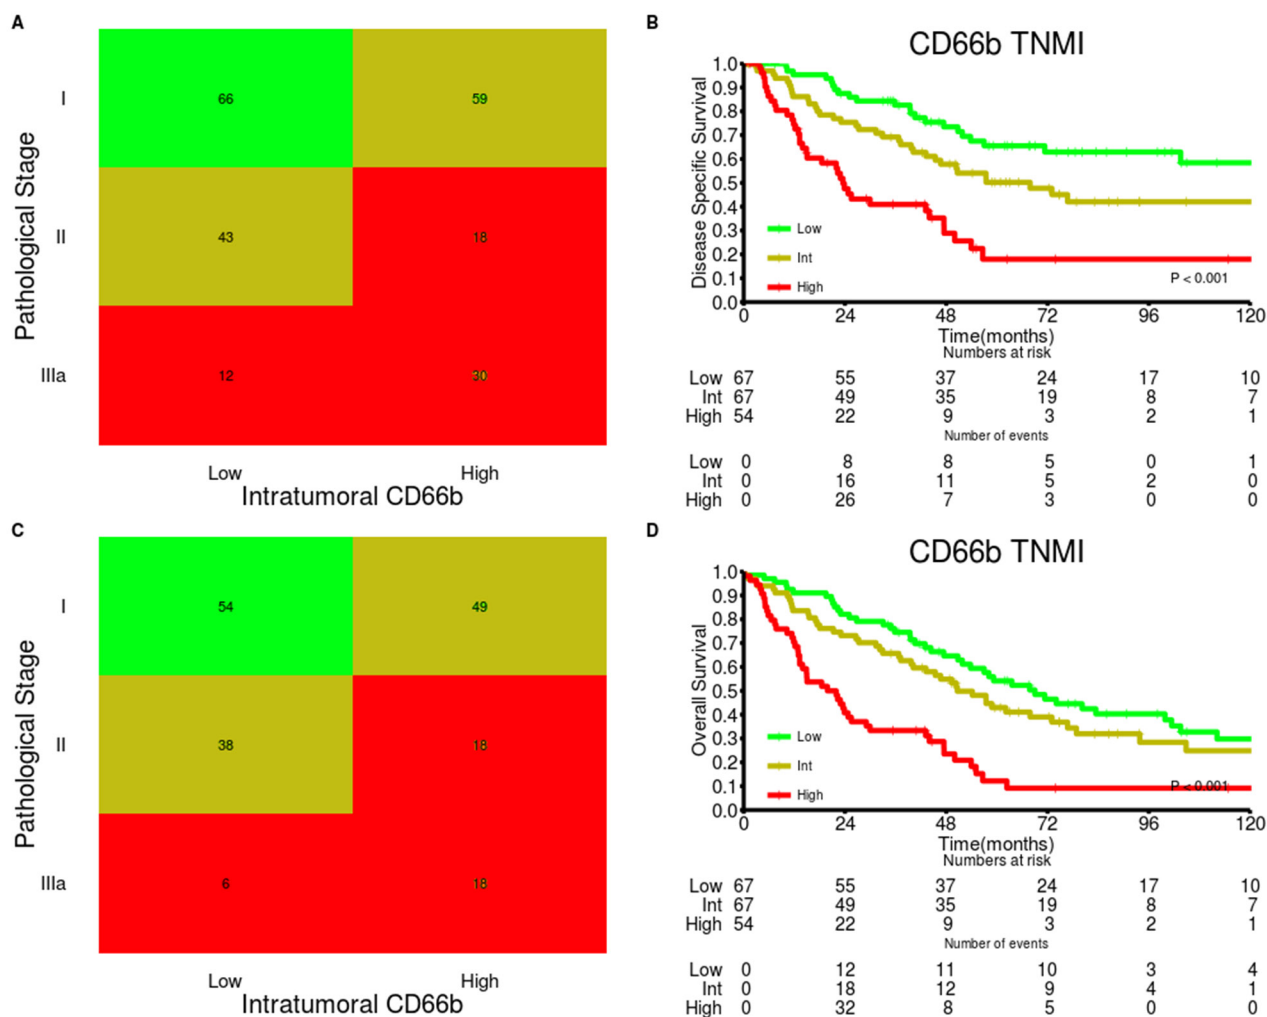

**Supplementary Figure S3:** CD66b TNM-I in ADC of NSCLC through DSS **A, B**, and OS **C, D**, endpoints. **A, C**) Distribution of ADC patients with similar survival in each pathological stages, and **B, D**) CD66b Immunoscore. (good prognosis: light green; intermediate prognosis: moss green; poor prognosis: red).

**Supplementary Table S1:** List of 104 tumor-associated markers (99 proteins and 5 microRNAs) investigated in our cohort.

See Supplementary File 1
